# Supplementary material for: Perilipin 2–positive mononuclear phagocytes accumulate in the diabetic retina and promote PPARγ-dependent vasodegeneration
Source: PubMed Central journal article supplement (PMC10702478; doi:10.1172/jci161348), 2023-10-02
Supplement: jci-133-161348-s255.pdf [file jci-133-161348-s255.pdf]

## Supplementary figures

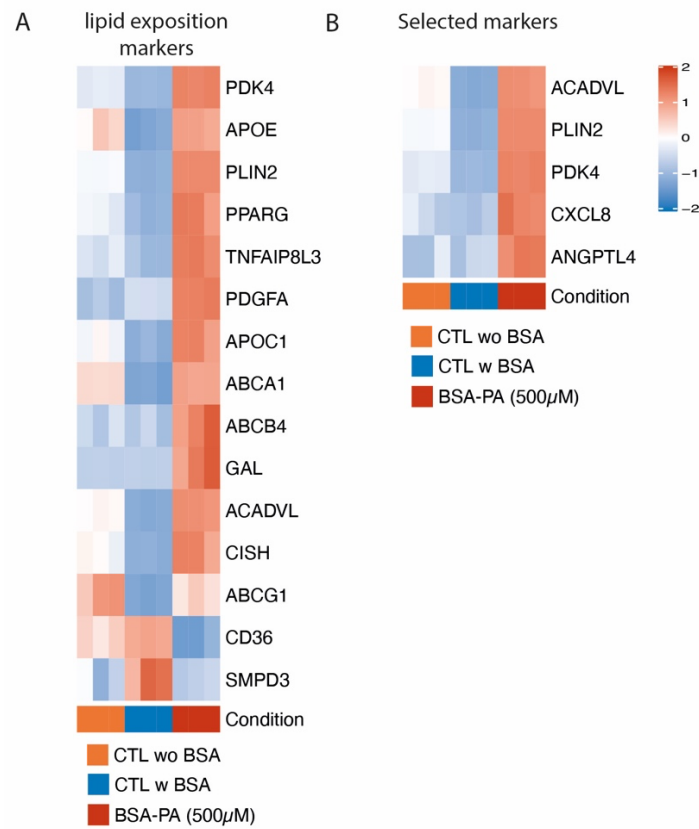

**Supplemental Figure 1. Comparison of lipid exposition markers and DR associated gene in the absence or presence of BSA.** RNAseq transcriptomic analysis of healthy donor naive Mos differentiated for 18 h in the presence of BSA-bound PA (red), BSA (blue) or in the absence of BSA (orange). **(A)** Heatmap representation of the log<sub>2</sub> vst of transcripts with a log<sub>2</sub> FC  $\geq$  4 and belonging to the GO pathway 'fatty acid metabolic process'. **(B)** Heatmap representation of the log<sub>2</sub> vst of the selected marker of lipid exposition.

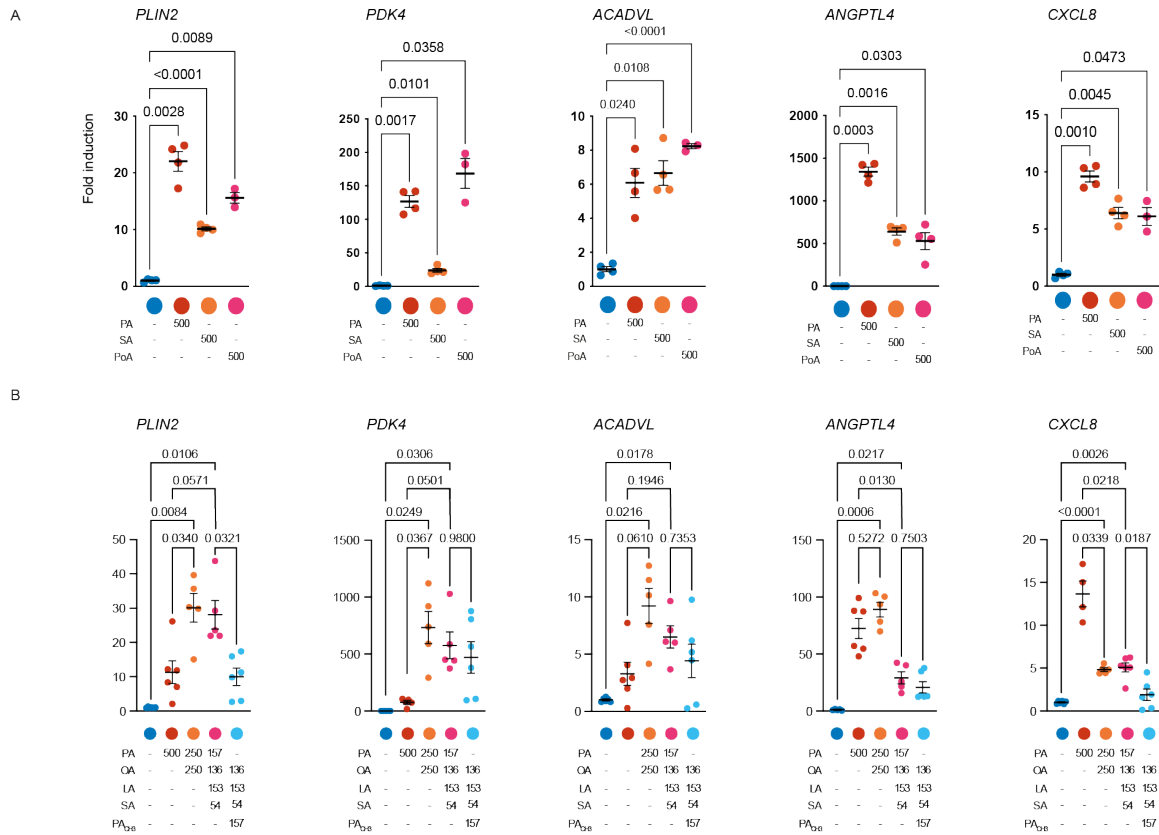

**Supplemental Figure 2. FFA alone or in combination induce the expression of *PLIN2*, *PDK4*, *ACADVL*, *ANGPTL4*, and *CXCL8*.** (A). RT-qPCR quantification of *PLIN2*, *PDK4*, *ACADVL*, *ANGPTL4*, and *CXCL8* in healthy-donor naive Mos treated for 18 h with either BSA only (unbound BSA, blue dots), palmitate (PA-bound BSA, red dots), stearate (SA-bound BSA, orange dots), or palmitoleate (PoA-bound BSA, magenta dots). The values represent the mean ( $\pm$  SEM) of a minimum of independent culture points. p-values were determined by one-way Welch ANOVA tests ( $p < 0.0001$ ,  $p = 0.0003$ ,  $p < 0.0001$ ,  $p < 0.0001$ , and  $p < 0.0001$  for *PLIN2*, *PDK4*, *ACADVL*, *CXCL8*, and *ANGPTL4*, respectively) followed by Dunnett's T3 multiple comparison tests (p values are given for BSA vs the indicated group). (B) RT-qPCR quantification of *PLIN2*, *PDK4*, *ACADVL*, *ANGPTL4*, and *CXCL8* in healthy-donor naive Mos treated for 18 h with either PA (red dots), PA and oleate (OA-bound BSA, orange dots), or a blend of PA, OA, lineate (LA) and SA BSA-bound FA at the indicated concentration (magenta dots) or the same blend where PA is replaced by PA-CH<sub>3</sub> (light blue dots). The values represent the mean ( $\pm$  SEM) of independent culture points. P-values were determined by one-way Welch ANOVA tests ( $p < 0.0001$ ,  $p = 0.0004$ ,  $p = 0.0006$ ,  $p < 0.0001$ , and  $p < 0.0001$  for *PLIN2*, *PDK4*, *ACADVL*, *CXCL8*, and *ANGPTL4*, respectively) followed by Dunnett's T3 multiple comparison tests. (p values are given for the indicated group)

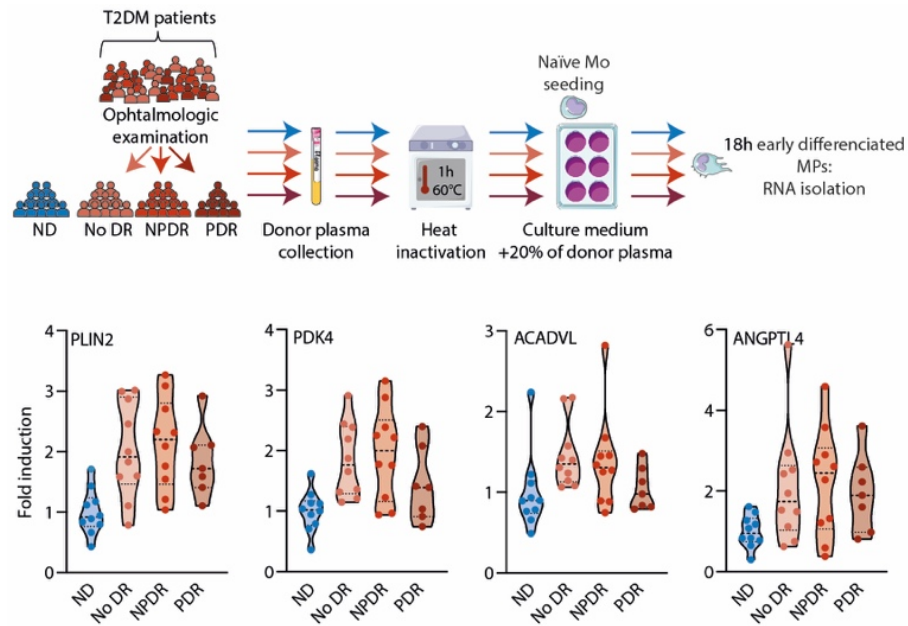

**Supplemental Figure 3. Effects of plasma from different groups of patients on lipid-associated genes in MPs. (Upper panel)** Schematic representation of donor phenotyping and group attribution, plasma preparation, and naïve Mo treatment. **(Lower panels)** and analyzed by RT-qPCR. (B) Violin plot representation of the relative expression of *PLIN2*, *PDK4*, *ACDVL*, and *ANGPTL4* determined by RT-QPCR in ealthy donor naïve Mos treated for 18 h with 20% heat inactivated individual donor plasma (dots) from either ND (n = 10), NO DR (no clinical signs of Diabetic Retinopathy; n=10), NPDR (non-proliferative DR; n=10) or PDR (proliferative DR; n=7). Dashed lines represent the median and quartiles.

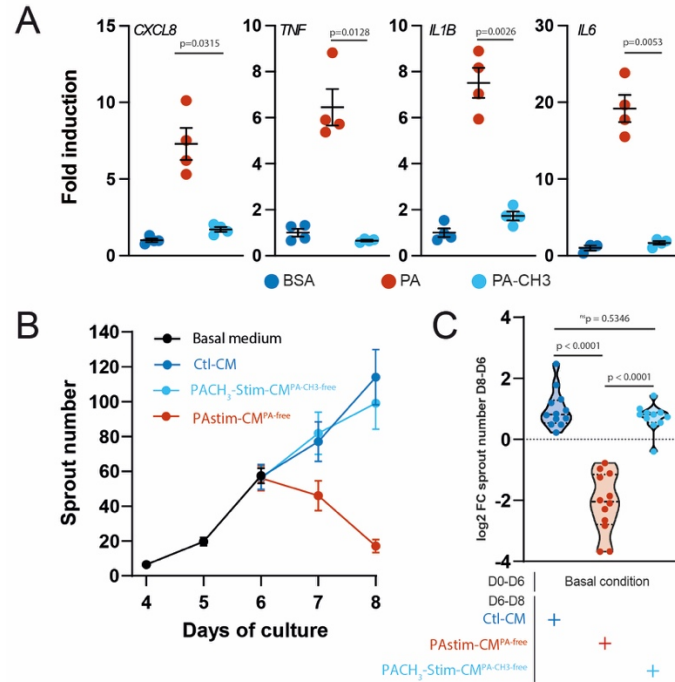

**Supplemental Figure 4. PA-CH3 does not trigger *CXCL8*, *TNF*, *IL1β*, or *IL6* expression nor induce vascular sprout degeneration (A)** RT-qPCR expression of *CXCL8*, *TNF*, *IL1*, and *IL6* by in healthy-donor naive Mos treated for 18 h with either BSA only (unbound BSA, blue dots), PA (PA-bound BSA, red dots), or PA-CH3 (PA-CH3-bound BSA, cyan dots). The values represent the mean ( $\pm$  SEM) of independent culture points. p-values were determined by one-way Welch ANOVA tests ( $p = 0.0034$ ,  $p = 0.0050$ ,  $p = 0.0005$  and  $p = 0.0011$  for *CXCL8*, *TNF*, *IL1*, and *IL6*, respectively) followed by Dunnett's T3 multiple comparison tests (p values are given for the indicated group). **(B)** Time course representation of the mean ( $\pm$  SEM) sprout number of aortic rings from D4 to D8 treated with Ctl-CM, PAstim-CM<sup>PA-Free</sup> or PACH<sub>3</sub>stim-CM<sup>PA-CH3-Free</sup>. **(C)** Violin plot representation of the log<sub>2</sub> FC in sprout number between paired D6 (before stimulation) and D8 (2 days after stimulation) rings; dots represent individual aortic rings and dashed lines the median and quartiles. p-values were determined by one-way Welch ANOVA tests ( $p < 0.0001$ ) followed by Dunnett's T3 multiple comparison tests.

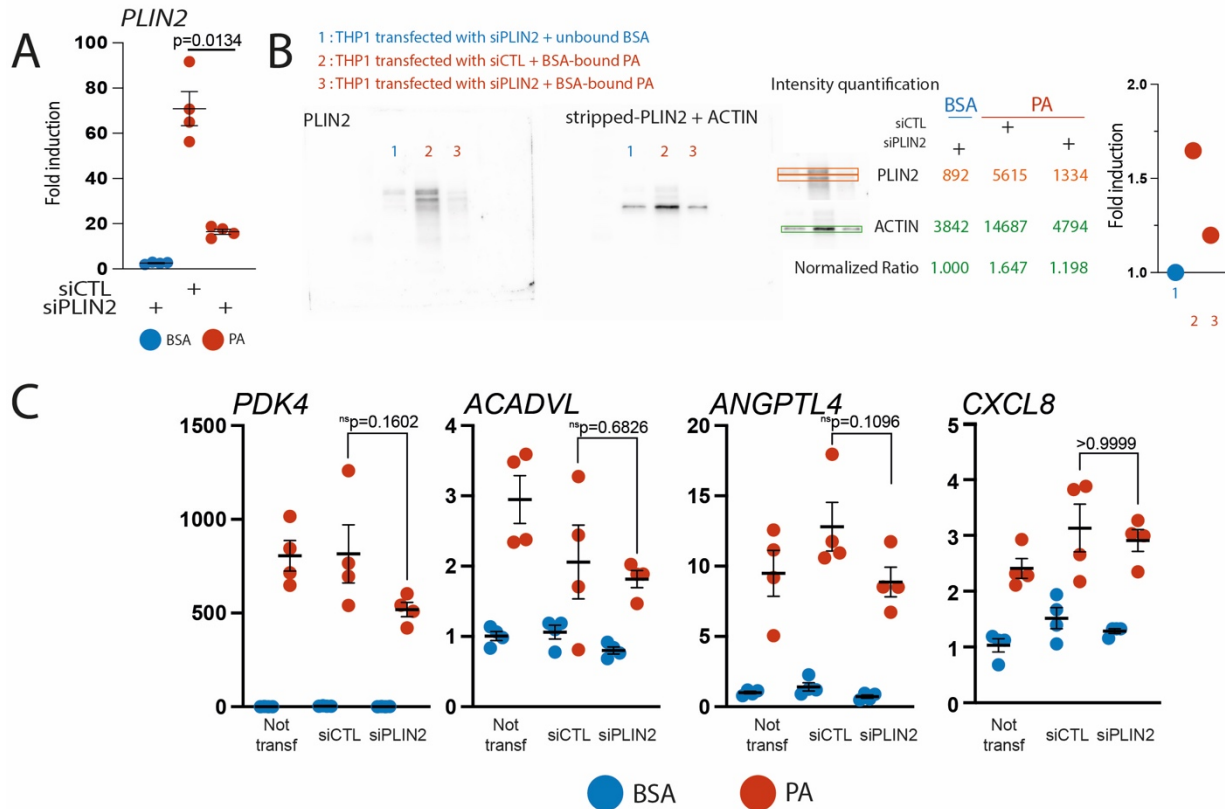

**Supplemental Figure 5. *PDK4*, *ACADVL*, *ANGPTL4*, and *CXCL8* are overexpressed in PLIN2-silenced THP1 cells stimulated with Palmitate.** (A) Scatter plot representation of the RT-qPCR quantification of *PLIN2* in THP1 cells transfected or not with the indicated siRNA and treated 6h later for 18 h with either BSA only (unbound BSA, blue dots) or palmitate (PA-bound BSA, red dots). The values represent the mean ( $\pm$  SEM) of a minimum of  $n = 4$  independent culture points. p-values were determined by one-way Welch ANOVA tests ( $p = 0.0003$ ) followed by Dunnett's T3 multiple comparison tests (p values are given for PA+siCTL vs PA+siPLIN2) (B) Uncropped images of Western Blot analysis of PLIN2 and ACTIN in THP1 cells transfected with siCTL and siPLIN2 and stimulated with BSA or PA (first two left images), the quantitative band analysis (right images) and the relative quantification of PLIN2. (C) Scatter plot representation of the RT-qPCR quantification of *PDK4*, *ACADVL*, *ANGPTL4*, and *CXCL8* in THP1 cells transfected or not with the indicated siRNA and treated 6h later for 18 h with either BSA only (blue dots) or PA (red dots). The values represent the mean ( $\pm$  SEM) of a minimum of  $n = 5$  independent culture points. p-values were determined by one-way Welch ANOVA tests ( $p = 0.001$ ,  $p = 0.0007$ ,  $p = 0.0001$ , and  $p = 0.0004$  for *PDK4*, *ACADVL*, *ANGPTL4*, and *CXCL8* respectively) followed by Dunnett's T3 multiple comparison tests (p values are given for PA+siCTL vs PA+siPLIN2).

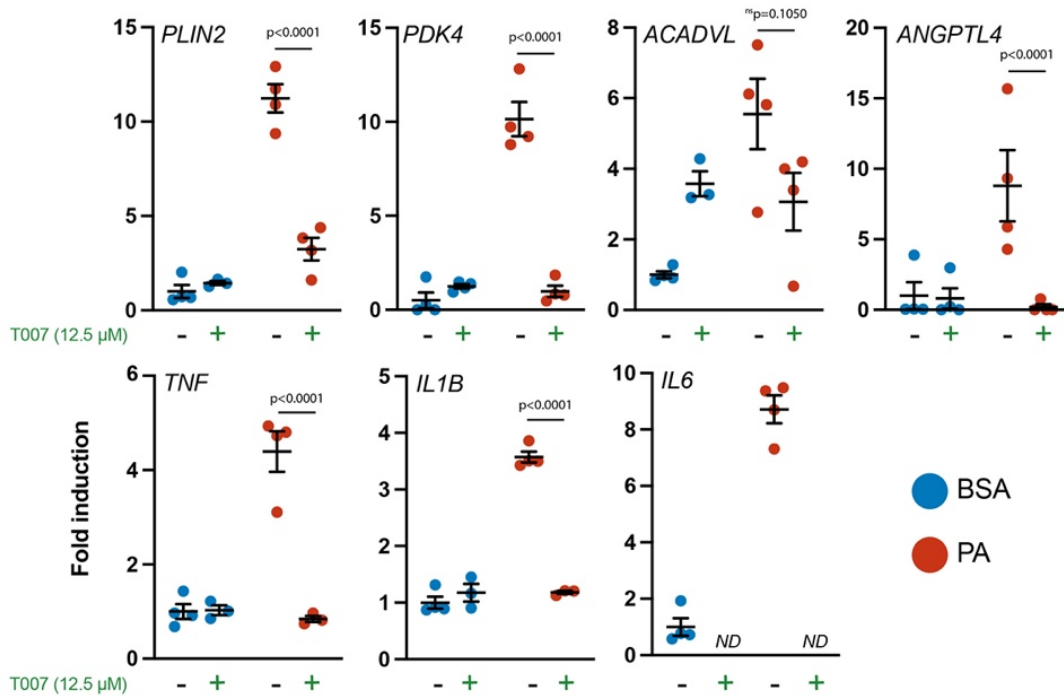

**Supplemental Figure 6. Inhibition of PPAR $\gamma$  by T0070907 normalizes the mRNA levels of key markers of Mos exposed to lipids** Scatter plot representation of the RT-qPCR quantification of PA-induced transcripts in healthy-donor naive Mos treated for 18 h with either PA (PA-bound BSA, red dots) or BSA only (unbound BSA, blue dots) and the PPAR $\gamma$  antagonist T0070907 (T007) at 12.5  $\mu$ M. For detected targets, the values represent the mean ( $\pm$  SEM) of n = 3-4 independent culture points; p-values were determined by two-way ANOVA tests. Turkey' multiple comparison tests were used to assess the effect of PA vs that of PA+T007. ND: not detected, no statistical test was performed for *IL6*.

# 1 METHODS

## 2 Experimental design

3 The primary goal of this study was to explore the presence of PLIN2<sup>+</sup> MPs in the retina of human  
4 DR patients. To demonstrate the non-anecdotal presence of PLIN2<sup>+</sup> cells in DR retinas, we  
5 collected retina from four donors with a known history of DM and compared to one control retina  
6 from a non-DM donor. Due to the rarity and considerable cost of human *post-mortem* retinas, we  
7 stopped eye collection after demonstrating the presence of PLIN2<sup>+</sup> MPs around at least one  
8 aneurism in the first 4 patients.

9 The second goal of this study was to determine the molecular cues that promote the differentiation  
10 of Mos into PLIN2<sup>+</sup> MPs. We chose to only use naive primary human cells to ensure the  
11 translational relevance of our study. Due to the constrains inherent to the collection and isolation  
12 of primary human Mos, each stimulation experiment was performed on a single donor (in total,  
13 this study involved 69 individual Mo isolations). The viability and purity of the isolations were  
14 systematically assessed by a qualified experimenter. A consistent response to PA stimulation  
15 (assessed by *PLIN2* upregulation) was prospectively determined as the primary inclusion criterion  
16 before subsequent analysis. All donors were found to respond to PA. The fold of induction differed  
17 between the donors but was not a subject of the analysis in the present study and thus no donors  
18 were excluded from the analysis. One PA preparation was found to not induce a Mo response and  
19 experiments using this preparation were excluded from the analysis. In other cases, all PA-  
20 solubilization preparations were able to induce the Mo response. A number of PA preparations  
21 used in this study were also successfully used in Couturier et al, 2021 (1). Intra-experiment

22 replicates varied between  $n = 3$  and  $n = 6$ , with the number being dependent on the number of Mos  
23 isolated from the donor and the number of experimental conditions to be tested. To improve the  
24 robustness of the presented data and account for possible RNA degradation during the RNA  
25 isolation process, RT-qPCR data points were subjected to agnostic outlier identification using  
26 Grubbs' method ( $\alpha = 0.05$ ) in GraphPad Prism 9 (RRID:SCR\_002798), and any identified  
27 outliers were removed from the subsequent statistical analysis.

28 For the experiments using human plasma from T2DM and CTL donors, we used a bank established  
29 prior to the present study to stimulate naive donor Mos. Compelling preliminary data from 13  
30 plasma samples (two-tailed t test,  $p = 0.1464$ ) were used to help in determining the optimal sample  
31 size. We chose a study design with  $n = 40$  plasma samples ( $n = 10$  control ND plasma and  $n = 30$   
32 T2DM plasma samples evenly distributed between T2DM without DR, NPDR, and PDR). This  
33 represented a reasonable sample size operable by a single qualified experimenter and complied  
34 with our cell culture laboratory facility and donor Mo availability. It is sufficient to achieve an  
35 estimated power of 99.3%, 93.8%, and 79.4% for alphas of 0.05, 0.01, and 0.001, respectively, for  
36 ND  $n = 10$  vs T2DM  $n = 30$  plasma samples (Kane SP. Sample Size Calculator. ClinCalc:  
37 <https://clincalc.com/stats/samplesize.aspx>). No outliers were removed from the analysis.  
38 However, for technical reasons, three plasma samples were not used for the stimulation because  
39 clots or hemolysis were found at the time of stimulation.

40 Finally, we designed an alternative version of the classical rat aortic ring to study vasodegeneration  
41 for which we have published a comprehensive method paper (2). To prevent substantial variability  
42 between samples, statistical analysis was performed on the  $\log_2$  FC of the sprout numbers between  
43 paired D6 (before stimulation) and D8 (2 days after stimulation) rings. Under our conditions, we



44 routinely observed the log<sub>2</sub> FC growth of sprout numbers between paired D6 and D8 rings of ~1.0  
45 (SD ± 0.65) in the control condition. In the present study, we chose to study a biological difference  
46 of a 50% decrease (or a 100% increase) in the log<sub>2</sub> FC of sprout number and found that seven  
47 replicates per group is the minimum to achieve a power of 80% for an alpha set at 0.05.

#### 48 **Post-mortem retina immunofluorescence analysis**

49 Eyes from donors with a known history of diabetes and controls were collected through the  
50 Minnesota Lions Eye Bank (Supplemental Table 1). Donor families gave informed consent. Whole  
51 eyes were fixed with 4% paraformaldehyde (PFA) before shipping. The retinas were cut in 2-mm  
52 diameter punches and stored at -80°C in PFA until use.

53 Before immunostaining, punches were treated with 0.5% triton X-100 and postfixed with acetone.  
54 Punches were incubated with primary antibodies (Supplemental Table 09) for at least two days at  
55 4°C, and then incubated with secondary antibodies at 1/500 for 2 h at room temperature. Nuclei  
56 were counterstained with 1/1000 Hoechst. Punches were flat mounted and images were acquired  
57 using an inverted Olympus confocal FV1000 (RRID:SCR\_016840) microscope or a Yokogawa  
58 CQ1 imager (RRID:SCR\_023270).

#### 59 **FFA solubilization and medium preparation**

60 Mo were cultured in 'DMEM, no glucose' (ThermoFisher Scientific Cat. #11966025)  
61 supplemented with 5 mM glucose, 20 mM mannitol (Merck, RRID:SCR\_001287, Cat. #240184),  
62 1 mM pyruvate (ThermoFisher Scientific, RRID:SCR\_008452, Cat. #11360070), and 50 unit.ml<sup>-1</sup>  
63 <sup>1</sup> penicillin - 50 µg.ml<sup>-1</sup> streptomycin (ThermoFisher Scientific, Cat. # 15140122). Different

64 glucose concentrations (2.5 and 25 mM) were also used for certain specified experiments.  
65 Mannitol concentration was adjusted to maintain osmolarity.

66 To allow FFA solubilization in culture medium, FFA (PA, SA, PoA, OA, LA (Merck  
67 (RRID:SCR\_001287), Cat. #P0500; #S4751; #P9417; #O1008; #L1376, respectively)) were  
68 bound to BSA FFA-free (Merck, Cat. #A8806). FFA were first dissolved in absolute ethanol  
69 (EtOH) to obtain a stock solution of 0.1 M and stored at -20°C. This solution was diluted at 1:200  
70 in BSA-culture medium (0.88% w/v of BSA) to obtain the working concentration (500 μM FFA,  
71 0.5 % v/v EtOH; FFA/BSA molar ratio of 3.8). Different FFA concentrations were also used for  
72 certain specified experiments. BSA and EtOH concentrations remained unchanged in all settings.

### 73 **Plasma donor cohort recruitment**

74 Plasma samples from T2DM patients and healthy donors were collected from Mexican volunteer  
75 donors at the Institute of Ophthalmology Foundation Conde de Valenciana (Mexico City, Mexico).  
76 Collected data included physiological (sex, age, body mass index [BMI], and blood pressure) and  
77 biochemical plasma parameters (HbA1c, glucose, total cholesterol, HDLc, LDLc, VLDLc,  
78 triglycerides, and creatine). For the T2DM patients, the eye fundus of the worst eye was used to  
79 determine DR grading. All donors were Mexican citizens. No other demographic information was  
80 collected. The study approval is detailed bellow.

### 81 **Monocyte isolation and treatment**

82 Human naive Mos were isolated from the peripheral blood of healthy volunteer donors or  
83 cytopheresis residuum. Lymphoprep (Stemcell Technologies, RRID:SCR\_013642, Cat. #07851)  
84 density gradients were used for mononuclear cell isolation and CD14<sup>+</sup> Mos were negatively

85 selected using an EasyStep Human Monocyte Enrichment Kit (Stemcell Technologies, Cat.  
86 #19059). Mos were seeded at approximately 470,000 cells.cm<sup>-1</sup> and naively differentiated for 18  
87 h or treated with FFA. In specified experiments, the effects of various glucose concentrations or  
88 PPAR $\alpha$  and PPAR $\gamma$  agonists or antagonists were also tested. Treatment started at the time the cells  
89 were seeded (t 0h) and lasted until the end of the culture period (t 18h).

### 90 **Conditioned medium preparation**

91 To obtain CM free of BSA and PA, Mos were first cultured for 18 h and then culture medium was  
92 removed. The early differentiated MPs were then cultured for another 24 h in fresh control culture  
93 medium. For Aortic ring and HUVEC proliferation CM were concentrated 30x using  
94 Amicon Ultra-4 10K Centrifugal Filters (Merck, Cat. #UFC801024).

### 95 **PLIN2 silencing**

96 THP1 cells (kindly provided by Dr Fitting, C., Institut Pasteur, Paris, France) were FBS-starved  
97 overnight and transfected with Lipofectamine RNAiMAX (ThermoFisher Scientific, USA, Cat. #  
98 13778100) for 6 h with 50 nM of a control siRNA (siCTL Silencer<sup>®</sup> Negative Control No. 2  
99 siRNA (ThermoFisher Scientific, Cat. #AM4613)) or with *PLIN2*-targeting siRNA (ThermoFisher  
100 Scientific, siRNA ID s1055, Cat. # 4392420) in Opti-MEM (Thermo Fisher Scientific Cat.  
101 #51985034). After the 6 h, transfection medium was removed and THP1 were seeded in NG or  
102 NGPA for 18h before RT-qPCR and Western-blot experiments.

### 103 **Western blotting**

104 THP1 cells were lysed in RIPA lysis buffer (ThermoFisher Scientific, Cat. #89900). Protein  
105 concentration was assessed with the Pierce BCA Protein Assay Kit (ThermoFisher Scientific, Cat.

106 #23227). 20 µg of protein extracts were separated in 4–15% SDS-PAGE precast gels (Bio-Rad  
107 Laboratories, RRID:SCR\_008426, Cat. #4561086), transferred on a nitrocellulose membrane  
108 (Bio-Rad Laboratories, Cat. #1620115) and incubated with PLIN2 (1:1000; Invitrogen Cat# PA5-  
109 29099) or β-actin (1:2000; Cat. #8H10D10, Cell Signaling Technology) antibodies. After  
110 overnight incubation at 4°C , membranes were incubated with HRP-conjugated secondary anti-  
111 rabbit or anti-mouse (1:2500, Cat. #7074s and #7076s, Cell Signaling Technology) antibodies and  
112 revealed with Amersham ECL Prime Western Blotting Detection Reagent (Cytiva, USA Cat. #  
113 RPN2232). Band intensities were analyzed using ImageJ Analyze Gel tool (Rasband, W.S.,  
114 ImageJ, U. S. National Institutes of Health, Bethesda, Maryland, USA, <https://imagej.nih.gov/ij/>,  
115 1997-2018).

#### 116 **HUVEC culture and treatment**

117 Human umbilical vein endothelial cells (HUVECs) were obtained from PromoCell (Germany, Cat  
118 #C-12253), and grown no later than passage 10 in EGM<sup>TM</sup> Endothelial Cell Growth Medium  
119 BulletKit<sup>TM</sup> (Lonza (RRID:SCR\_000377, Cat. #CC-3124) medium until stimulation. For  
120 proliferation assays, concentrated CM were diluted 1:30 in EGM medium. HUVECs were cultured  
121 for 24h, fixed with PFA (ThermoFisher Scientific, Cat. #047392.9M) and stained with 1:1000  
122 Hoechst 34580 (ThermoFisher Scientific, Cat. #H21486) and nuclei counted. For TUNEL assay,  
123 HUVEC were starved for 2h and then stimulated with CM (1:4). After 48h, the number of TUNEL  
124 positive cells was determined using the In Situ Cell Death Detection Kit, TMR red (Merck, Cat.  
125 #12156792910)

126 **Lipidomic analysis**

127 Total lipids were extracted from MPs according to Moilanen and Nikkari (3) and FA composition  
128 was determined as previously described (4). The data were processed using EZChrom Elite  
129 software from Agilent Technologies (RRID:SCR\_013575).

130 **RNA extraction and sequencing and RT-qPCR**

131 RNA extractions were performed using NucleoSpin® RNA isolation kits (Macherey-Nagel GmbH  
132 & Co. KG, Germany, Cat. #740990 and #740962). RNA sequencing libraries were constructed  
133 from 250 ng total RNA using a modified TruSeq RNA Sample preparation kit protocol. Pass-  
134 filtered reads (using Trimmomatic) were mapped using HiSAT2 and aligned to human reference  
135 genome GRCh38.95 (5). The count table of the gene features was obtained using HTSeq.  
136 Normalization and differential expression analysis values were computed using DESeq2 (6).  
137 TPMs were determined using Libinorm using the htseq mode (7).

138 For RT-qPCR, cDNA was synthesized using the QuantiTect® reverse transcription kit (Qiagen  
139 [RRID:SCR\_008539], Cat. #205311). qPCR were performed using Power Sybr Green PCR  
140 Master Mix (Thermo Fisher Scientific, Cat. #4367659) with the following profile: 10 min at 95°C,  
141 followed by a total of 40 two-temperature cycles (15 s at 95°C and 1 min at 60°C). Results are  
142 expressed as the fold induction after normalization against housekeeping genes (previously  
143 validated by RNAseq data). Primers (Supplemental Table 10).

144 **Multiplex bead immunoassay**

145 Cytokine and growth factor concentrations were measured using the Bio-Plex Pro™ Human  
146 Cytokine 27-plex Assay (Bio-Rad Laboratories, Cat. #M500KCAF0Y). Among these

147 proteins, IL12 and IL13 (not detected under any conditions), as well as IL8 (detected beyond the  
148 range of quantification) were not plotted in the graphs.

#### 149 **Aortic ring assay**

150 For the study of vasodegeneration, we designed an alternative version of the classical rat aortic  
151 ring to study vasodegeneration for which we have published a comprehensive method paper (2).  
152 On day 4, the medium was changed and the daily counting of sprouts was started. On day 6, groups  
153 were constituted and treated with 1x dilution of the concentrated CM and the aortic rings cultured  
154 for two days. On day 8, some of the aortic rings were fixed with 4% PFA and labeled with anti-  
155 collagen IV antibody (Supplementary Table S9) for two days at 4°C. Images were acquired using  
156 epifluorescence Leica DM5500 B (RRID:SCR\_018896) and inverted confocal Olympus FV1000  
157 microscopes.

#### 158 **Statistical analysis**

159 GraphPad Prism 8 was used for all graphical representations and for all but the RNAseq statistical  
160 analysis. For the donor plasma experiments, each individual donor point is represented by a dot  
161 and a global distribution profile is shown using truncated violin plots with medians and the  
162 quartiles represented as dashed lines. For these experiments, we did not assume normality and the  
163 statistical analysis of differences was performed using two-tailed Mann Whitney tests and  
164 correlations computed using two-tailed nonparametric Spearman correlations.

165 For all other experiments, values obtained from individual Mo isolations were assumed to follow  
166 a normal distribution, with no assumption of equal variance. Statistical differences between two  
167 sample groups were evaluated using two-tailed Welch's t tests and differences between more than

168 two sample groups were analyzed using one-way Welch ANOVA tests corrected for multiple  
169 comparisons by Dunnett T3 test.

170 When two independent challenges were used (i.e glucose and PA) two-way ANOVA was used,  
171 we report individual parameter p-values, as well as parameter interaction p-values, for two-way  
172 ANOVA Turkey's post-test was used for multiple comparisons. A p-value (or p-value corrected  
173 for multiple comparisons when applicable) of less than 0.05 was considered significant

#### 174 **Study approval**

175 Plasma samples from T2DM patients and healthy donors were collected from Mexican volunteer  
176 donors at the Institute of Ophthalmology Foundation Conde de Valenciana (Mexico City, Mexico),  
177 with approval from local committees and in accordance with the Declaration of Helsinki :  
178 Investigation Committee, Registry 13 CI 09 015 261, Protocol number CI-051-2015. Research  
179 Ethics Committee, Registry 13 CEI 09 015 095, Protocol number CEI-2015-11-05 and Biosafety  
180 Committee Registry 13 CB 31 050 269, Protocol number CB-051-11-2015. Subjects provided  
181 written informed consent prior to participation in the study

#### 182 **Data and materials availability**

183 Experimental materials are available upon request with no restrictions. The RNA-Seq raw fastq  
184 files and count files were deposited in the NCBI's Gene Expression Omnibus database  
185 ([GSE239512](https://www.ncbi.nlm.nih.gov/geo/query/acc.cgi?acc=GSE239512)).

186

#### 187 **References:**

188

189 1. Couturier A, Blot G, Vignaud L, Nanteau C, Slembrouck-Brec A, Fradot V, et al. Reproducing  
190 diabetic retinopathy features using newly developed human induced-pluripotent stem cell-  
191 derived retinal Muller glial cells. *Glia*. 2021;69(7):1679-93.

192 2. Blot G, Sartoris TM, Sennlaub F, and Guillonneau X. Modifications to the classical rat aortic ring  
193 model to allow vascular degeneration studies. *STAR Protoc*. 2021;2(1):100281.

194 3. Moilanen T, and Nikkari T. The effect of storage on the fatty acid composition of human serum.  
195 *Clin Chim Acta*. 1981;114(1):111-6.

196 4. Koehrer P, Saab S, Berdeaux O, Isaico R, Gregoire S, Cabaret S, et al. Erythrocyte phospholipid and  
197 polyunsaturated fatty acid composition in diabetic retinopathy. *PloS one*. 2014;9(9):e106912.

198 5. Kim D, Langmead B, and Salzberg SL. HISAT: a fast spliced aligner with low memory requirements.  
199 *Nat Methods*. 2015;12(4):357-60.

200 6. Love MI, Huber W, and Anders S. Moderated estimation of fold change and dispersion for RNA-  
201 seq data with DESeq2. *Genome Biology*. 2014;15(12):550.

202 7. Dyer NP, Shahrezaei V, and Hebenstreit D. LiBiNorm: an htseq-count analogue with improved  
203 normalisation of Smart-seq2 data and library preparation diagnostics. *PeerJ*. 2019;7:e6222.

204
